# Supplementary material for: A pilot with computer-assisted psychosocial risk –assessment for refugees
Source: Springer Nature journal article supplement (doi:10.1186/1472-6947-12-71), 2012-07-16

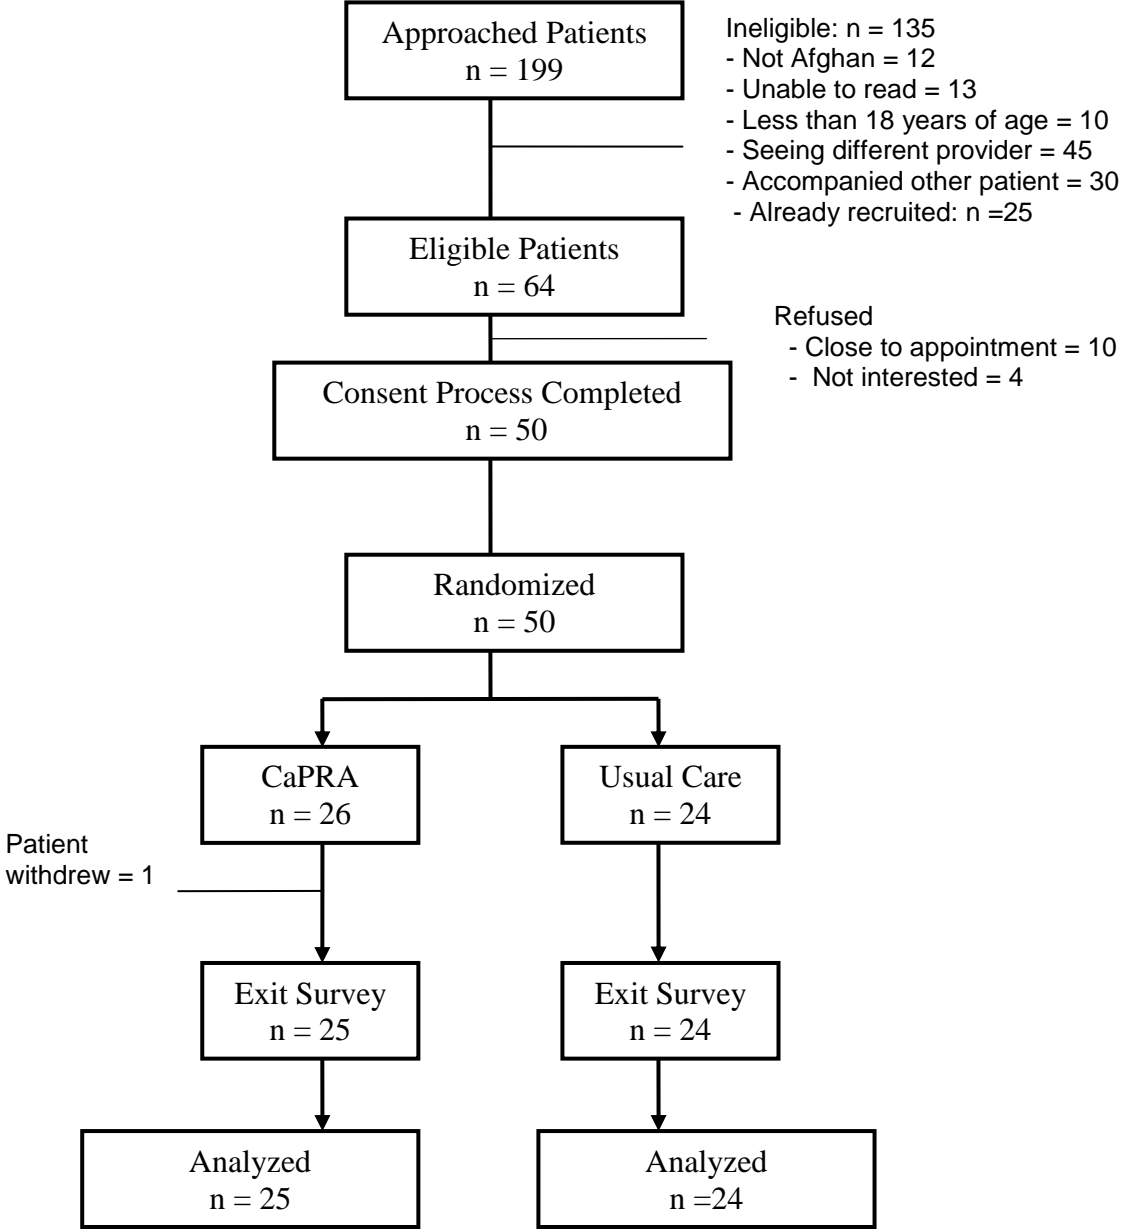

Supplement: 12911_2011_503_MOESM1_ESM.pdf [file 12911_2011_503_MOESM1_ESM.pdf]
